# Supplementary material for: Morphology-Controlled Synthesis of V1.11S2 for Electrocatalytic Hydrogen Evolution Reaction in Acid Media
Source: MDPI journal article supplement (doi:10.3390/molecules27228019), 2022-11-18
Supplement: s1 [file s1]

## Support information

# Morphology-Controlled Synthesis of $V_{1.11}S_2$ for Electrocatalytic

## Hydrogen Evolution Reaction in acid media

Qiuyue Chen <sup>a, b, c</sup>, Siqi Tian <sup>b</sup>, Xiaonan Liu <sup>a, \*</sup>, Xuguang An <sup>b</sup>, Jingxian Zhang <sup>b</sup>, Longhan Xu <sup>b</sup>, Weitang Yao <sup>b</sup>, Qingquan Kong <sup>b, \*</sup>

<sup>a</sup> College of Chemical Engineering, Sichuan University of Science & Engineering, Zigong 643000, China

<sup>b</sup> School of Mechanical Engineering, Chengdu University, Chengdu 610106, China

<sup>c</sup> School of Chemical Engineering, Sichuan University, Chengdu 610065, China

Corresponding author: Tel.: +86 28 84616169; fax: +86 28 84616169.

E-mail address: kongqingquan@cdu.edu.cn (Q.Q. Kong); lxn@suse.edu.cn (X. Liu)

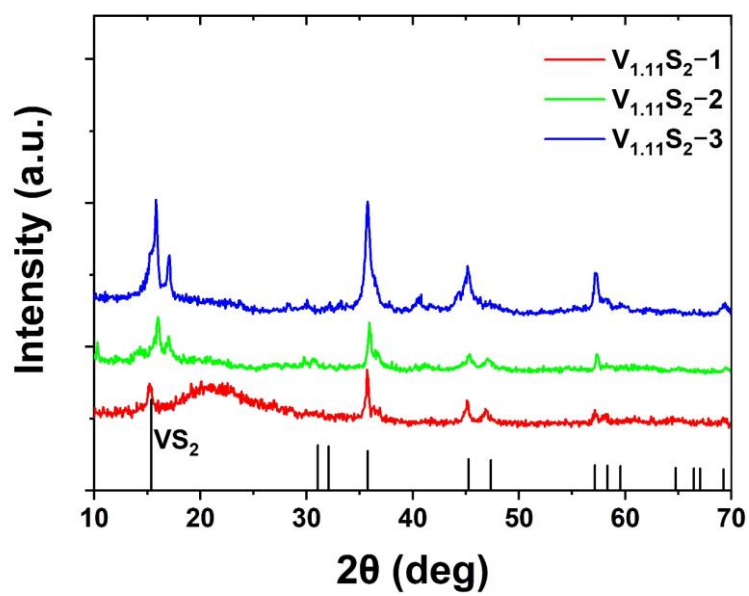

**Figure S1** XRD patterns of hydrothermal synthesis precursor powder before annealing.

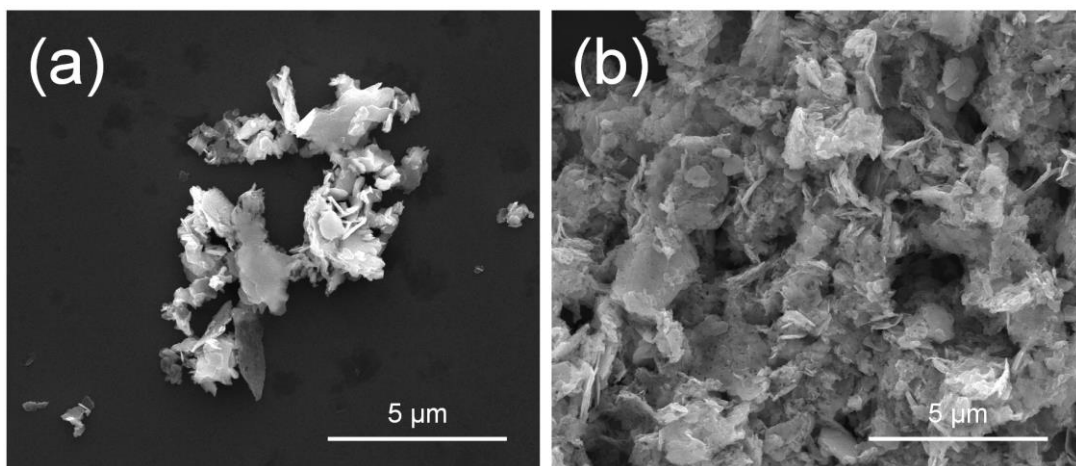

**Figure S2** FE-SEM images of (a)  $V_{1.11}S_2$ -2, and (b)  $V_{1.11}S_2$ -3 materials.

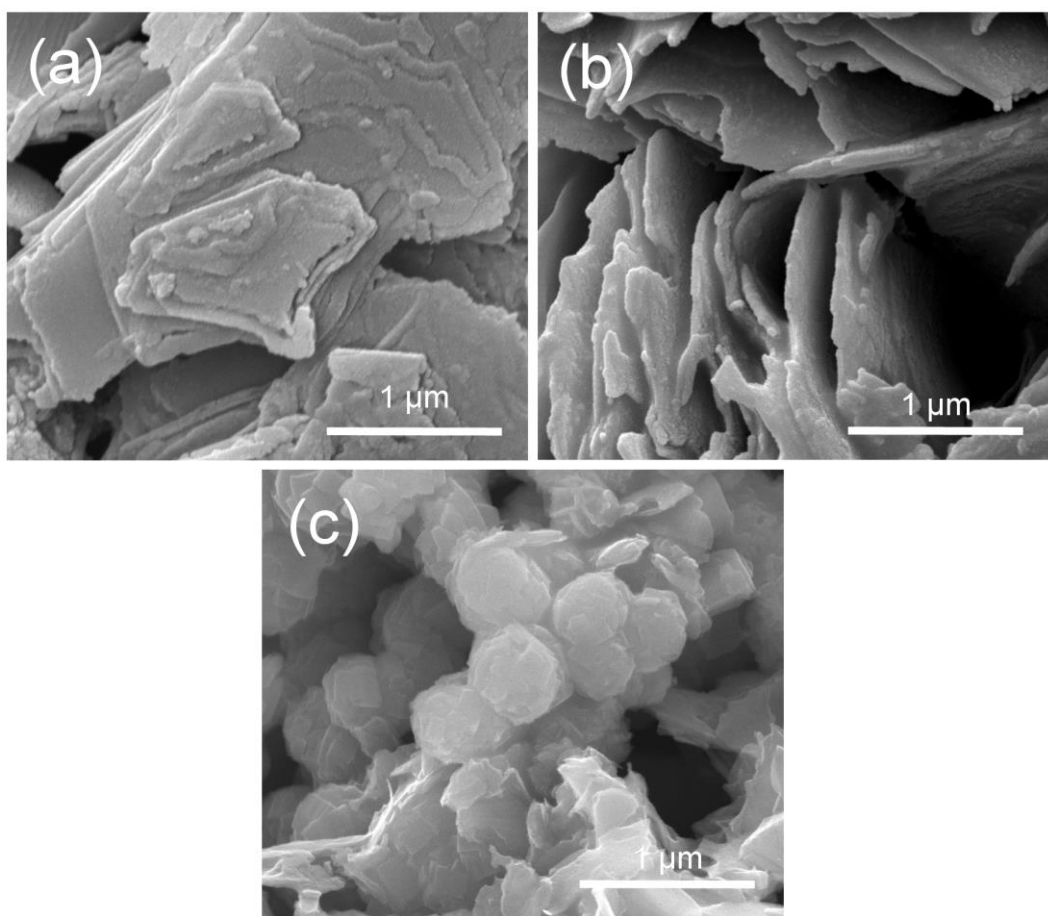

**Figure S3** FE-SEM images of precursor powder before annealing, (a)  $V_{1.11}S_2$ -1, (b)  $V_{1.11}S_2$ -2, and (c)  $V_{1.11}S_2$ -3, respectively.

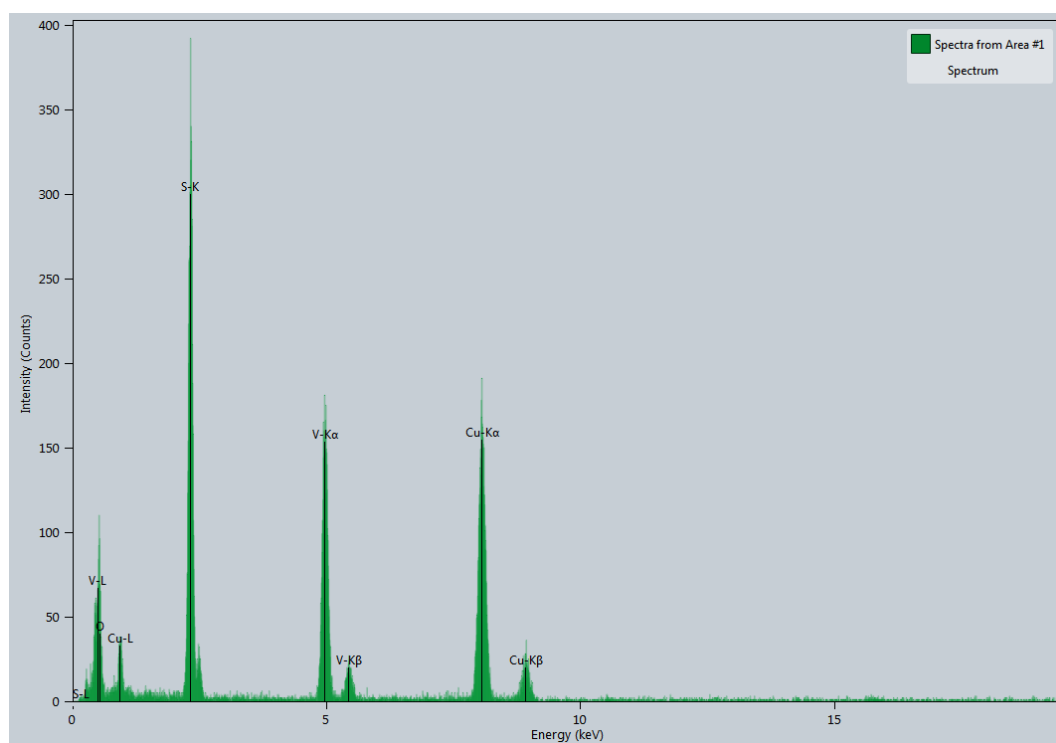

**Figure S4** EDS pattern of  $V_{1.11}S_2-1$  materials.

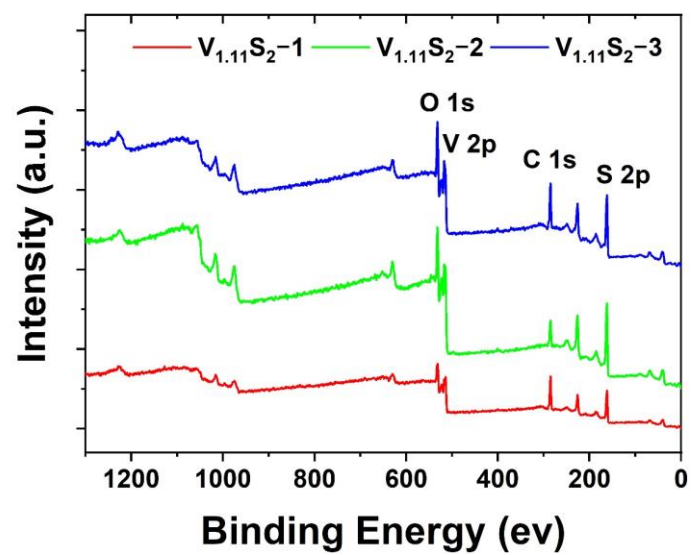

**Figure S5** XPS survey spectra of  $V_{1.11}S_2-1$ ,  $V_{1.11}S_2-2$ , and  $V_{1.11}S_2-3$  materials.

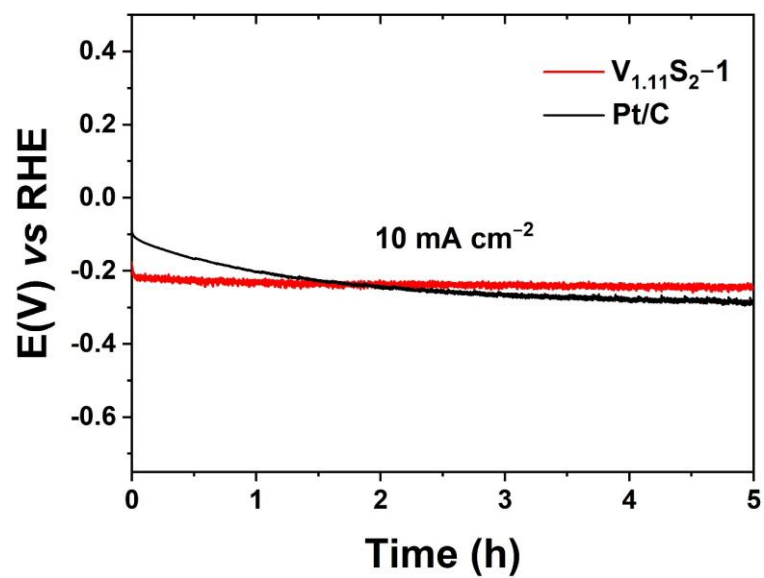

**Figure S6.** Chronopotentiometry curve of  $V_{1.11}S_2-1$  and Pt/C recorded at the current density of  $10\text{ mA cm}^{-2}$  for a total duration of 5 h.

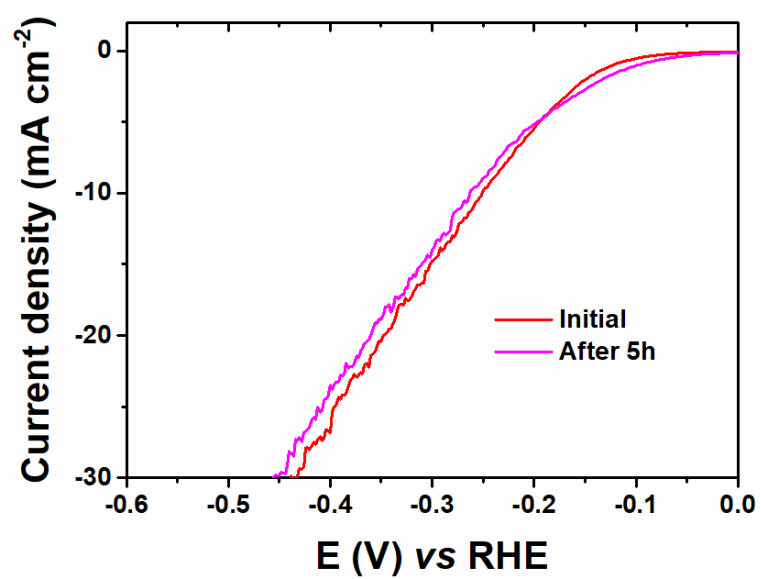

**Figure S7.** Initial (red line) and after 5 h (purple line) polarization curves of V<sub>1.11</sub>S<sub>2</sub>-1 material.



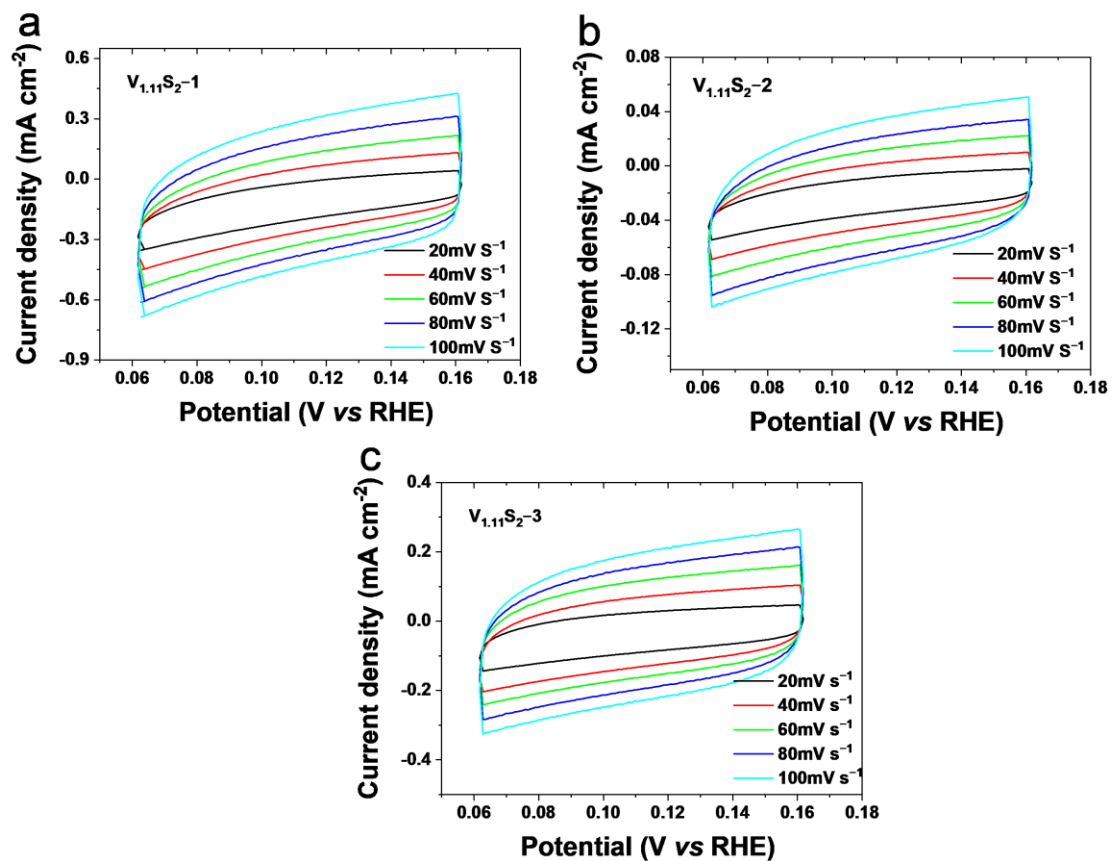

**Figure S8.** Voltammograms of (a)  $V_{1.11}S_2-1$ , (b)  $V_{1.11}S_2-2$  and (c)  $V_{1.11}S_2-3$  at various scan rates of 20, 40, 60, 80 and 100 mV s<sup>-1</sup>, respectively.

**Table S1** The electric double layer (Cdl) capacitance is obtained by fitting CV curve

| Catalyst                            | Cdl  | R-Square |
|-------------------------------------|------|----------|
| V <sub>1.11</sub> S <sub>2</sub> -1 | 3.4  | 0.9993   |
| V <sub>1.11</sub> S <sub>2</sub> -2 | 0.45 | 0.9999   |
| V <sub>1.11</sub> S <sub>2</sub> -3 | 1.9  | 0.9988   |
